# Supplementary material for: Novel Roles of cAMP Receptor Protein (CRP) in Regulation of Transport and Metabolism of Carbon Sources
Source: PLoS One. 2011 Jun 1;6(6):e20081. doi: 10.1371/journal.pone.0020081 (PMC3105977; doi:10.1371/journal.pone.0020081)
Supplement: Table S3 — Regulation targets of cAMP-CRP. (XLS) [file pone.0020081.s004.xls]

## Sheet: Sheet1
Table S3
Regulation targets of cAMP-CRP
Map	Left gene(s)*	Site	Right gene(s)*	Chip**	DB**	Sequence	Position (bp)
0.736215	carB>		>caiF		caiF	AGTGCATTACGACACC	33934.5
0.906227	caiTABCDE<		>fixABCX		caiT,fixA	TGTGATACCAATCACA	42078.5
1.42838	polB<	araD	<araA			CGCGCTCGCGATCAAC	66449.5
1.51174	araBAD<		>araC		araB,araC	CGTGATTATAGACACT	70206.5
1.92595	fruR>		>mraZW-ftsLI-- --lpxC			TGTCAAGCCAGTCACA	89550.5
2.07441	murF>	mraY	>murD			CGCGCTGTTCATCTCA	96104.5
2.5	ppdD-hofBC<		<nadC		ppdD	-	-
2.6	aroP<		>pdhR-aceEF-lpd		pdhR	-	-
2.8	yacH<		>acnB		acnB	-	-
2.8	aceF>		>lpd		lpd	-	-
3.04642	gcd<		>hpt		gcd,hpt	TGTGATGACGATCACA	141294
3.48258	sfsA-dksA-yadB<		<ligT		sfsA	-	-
4.9256	alaV>	rrlH	>rrfH			TGACAACCCGAACACC	228450
5.78795	ykfA-yafZ<		<perR			TGTGAACATGATCAAC	268510
6.5083	yagTSRQ<		>yagU			AGAGCTGAAAATCACA	302026
6.67361	matC-yagXWV<	matB	>matA			ACCGAGTGGCGTCACA	309750
6.7	ykgR<		>eaeH		ykgR	-	-
6.73478	ykgMO<		>insE			TGTGATACATGTCAAA	312550
7.38047	yahJ>	yahK	>yahL			GGTGATCAGGTAGAAA	342328
7.5	prpR<		>prpBCDE		prpR,prpB	-	-
7.87844	lacZYA<		<lacI		lacZ	TGTGAGTTAGCTCACT	365628
7.92399	mhpR-lacI<		>mhpABCDFE		mhpA	-	-
8.4002	hemB<		<insF			TATGATCCCAATCAAG	389608
8.62694	ddlA<		>iraP			TGTGCGCAAGATCACA	400298
8.76018	yaiA>		>aroM			AGGGATCTGCGTCACA	406444
8.87369	araJ<		<sbcC		araJ	-	-
9.07314	brnQ>	proY	>malZ			CGCCAAATACATCACT	421114
9.29733	tsx<		<yajI		tsx	CGTGAACGCAATCGAT	431388
9.7	cyoABCDE<		<ampG		cyoA	-	-
9.92467	lon>		>hupB		hupB	-	-
10.329	maa<		<hha			TGTGATAAAGATCACA	479104
						AGCGATACAACTCACC	479228
11.7647	allDC-ylbA<		>fdrA-ylbEF-ybcF			TGTGATATTCATCACC	545810
11.9247	lpxH<	ppiB	>cysS			CATGCCGTCAACCACT	553278
11.9658	ppiB-lpxH<	cysS	<ybcI			CGTTAAGACGATCACG	555156
12.4154	nmpC<		>essD-ybcS-rzpD		nmpC	AGAGATCTACTTCACA	576166
12.8916	cusB>	cusA	>pheP			TGCGCGGTTTCTCACA	598188
13.1	fepA-entD<		>fes-ybdZ-entF-fepE		fepA	-	-
13.4446	fepB<		>entCEBA-ybdB		entC	-	-
13.554	entA>	ybdB	>cstA		cstA	TGTTAACTCGATCACT	628988
13.8683	rnk<		<rna			TGTGACGCAAATCACT	643320
14.8105	gltI-sroC-gltJKL<		<insH			AGTGAGATCTCTCCCA	687230
15.1508	nagBACD<		>nagE		nagB,nagE	GGTGACAAAACTCACA	703002
15.2454	glnS>		>ybfM			TGAGAAAAGTCTCGCT	707472
15.3	fur<		<uof		fur	-	-
15.5867	kdpE<	kdpD	<kdpC			CGAGATCAAACTCGCT	723360
15.9893	ybgH<		>ybgIJKL-nei			TATGAATAAACACGCA	741772
16.3	gltA<		>sdhCDAB-sucABCD		gltA,sdhC	CGTGACCTGGATCACT	754098
16.3	sdhC>		>sdhDAB		sdhD	-	-
17.0561	galETKM<		<modF		galE	-	-
17.1181	ybhT>		>modABC		modA	-	-
17.2306	pgl>	ybhD	>ybhH			CATGAACAACGTCACA	799348
17.5668	uvrB>	ybhK	>moaABCDE			CCCGACGATGACCGCA	815104
17.8921	ybiH-ybhGFSR<	rhlE	<ybiA			AATGACAAAAACCACA	830026
18.0457	ybiJ<		<ybiI			CGTGATACTCATCACA	837206
18.0695	ybiI<	ybiX	<fiu			CTTGCTCACAGCCAAT	838492
18.1269	fiu<		<mcbA		fiu	-	-
18.3109	rhtA<		>ompX			ACTTATTTGAATCACA	849652
18.4296	ybiS<		>ybiT			TGTGATTTCGTACACA	855072
18.5192	ybiV<		<ybiW			TGTGCTCTGCGTCACA	859306
19.1081	ybjJI<		>ybjK			TGTGTACATTTGTACACA	886322
19.733	aqpZ<		>ybjD			GTTGCCCTAAATCAAA	915418
19.8751	cspD<		>clpS			AGTGATATTAGTCAAT	922230
20.3688	ycaC<		>ycaD			CGTGAGGAAGTTCAAA	945076
20.5565	focA-pflB<		<ycaO		focA	-	-
20.6207	ycaP>		>serC-aroA		serC	TGTGATGCAAGCCACA	956732
21.2586	ompF<		<asnS		ompF	TGTGAACACCGTCATA	986436
21.3307	pncB<		>pepN		pncB	-	-
21.8715	ymbA>		>rmf			TGTGAAGAGGAACAAA	1.01477e+06
21.9723	ompA<		<sulA		ompA	-	-
22.9	yccE>		>agp		agp	-	-
23.2445	putA<		>putP		putP	AGTGCTCAGCGACACT	1.07836e+06
23.6988	ycdY>		>ycdZ			TGTGATCTACGTCACT	1.09943e+06
						TGAGATCGAGCACACA	1.09948e+06
23.7648	csgDEFG<		>csgBAC		csgD	-	-
24.8	ycfH>		>ptsG		ptsG	CGTGATAGCCGTCAAA	1.15695e+06
25.1793	ycfQ<		>bhsA			TGTGATCCAGATCACA	1.16822e+06
25.8115	ymfED<		>lit			CGTGCTACTGATCACA	1.19759e+06
26.3998	minDE<	minC	>ycgJ			ACTGCAGTTAGTCGAA	1.22465e+06
26.5051	hlyE<		>umuDC		hlyE	-	-
26.6535	ycgB<		>dadAX		dadA	TGTGAGCCAGCTCACC	1.23669e+06
27.1122	pth-ychF<		>ychH		ychH	-	-
27.7512	tyrTV-tpr<	purU	<ychJ			AGTGACCAGAATCACT	1.28758e+06
27.9	adhE		>ychE			CGTGATCCAAATCAAA	1.29757e+06
28.2763	yciCB<		>ompW			TGTGATTTAAATCAAT	1.31189e+06
28.6082	yciK-btuR<		>sohB		sohB	-	-
28.8	yciX>		>acnA		acnA	-	-
28.8434	pgpB>		>yciSM-pyrF-yciH			CGTGATTTCGGTCACG	1.33832e+06
29.2917	puuA<		>puuDR			CATGCTCAATCTCACA	1.35914e+06
29.4941	pspE>	ycjM	>ycjNOPQRSTUV-ymjB			CCTGATGATAATCAAT	1.36855e+06
30.0718	insH>		>ynaJ			CGTGAATAACATCGCC	1.39505e+06
30.2315	abgABT-ogt<		>abgR			CGTGAACCGGGTCACA	1.40252e+06
						CGTGATTTTCATCACT	1.40262e+06
30.9015	uspF<		<ompN			TGTGAACTCCGTCATT	1.43371e+06
30.9992	micC>	ydbK	>ydbJ			CGCGATGAGCATCAAT	1.43822e+06
31.154	feaR<		>feaB		feaR	-	-
31.2921	maoC<		>paaABCDEFGHIJK		maoC,paaA	TGCGAAATCCGTCACA	1.45183e+06
31.9672	azoR<	hrpA	>ydcF			GGTGCGTTTAATCAAA	1.48319e+06
32.0314	ydcF>		>aldA		aldA	-	-
32.1	sokB>		>trg		trg	-	-
32.6585	yncL<		>ydcX			CTTGATGCACGTCAAA	1.51535e+06
32.9435	ydcD>		>ydcC			CGTGATTTACATCACA	1.52852e+06
33.2253	narZYWV<	narU	<yddJ			TTCGAGCATGGGCAAT	1.54164e+06
33.842	gadBC<		<pqqL		gadB	-	-
34.075	ydeN<		<ydeO			AGTGACATCCATCACA	1.58084e+06
34.4688	lsrRK<		>lsrACDBFG-tam		lsrA	TGTGATGGCAACCACA	1.59934e+06
34.6	uxaB<		<yneF		uxaB	-	-
34.6414	yneE<		<uxaB			CGTGATTACGATCACA	1.60709e+06
34.8094	yneK>		>ydeA			CGCGATCCAGATCACA	1.61497e+06
34.9	marC<		>marRAB		marR	-	-
35.0656	ydfG>	ydfH	>ydfZ			TGTGAGCTTGATCAAA	1.62714e+06
35.7066	ynfD>	ynfE	>ynfFGH-dmsD			CGCGCGAGAAATCGAA	1.65685e+06
35.9	dgsA<		<ynfL		dgsA	TGTGCTGTTAATCACA	1.66669e+06
36.3574	fumA<		>manA		fumA	-	-
36.517	uidABC<		<uidR		uidA	CGTGATATAGATCGCA	1.69427e+06
36.5838	malI<		>malXY		maII,malX	TGTGATTTATGCCTCA	1.6973e+06
36.8639	nth>		>tppB			CGTGATCAAGATCACG	1.71036e+06
37.3	ydhO>		>sodB		sodB	-	-
37.4042	ydhP<		<ynhF			CATGACAGCAATCACA	1.73538e+06
37.5728	mdtK>	ydhQ	>valVW			CTAGAATCAACACACC	1.74321e+06
38.0055	ydiH<	ydiI	<ydiJ			TGTGCTGTTCGTCACG	1.76328e+06
38.3377	ydiQ>	ydiR	>ydiST-fadK			TGTGACCATCGACAAT	1.77877e+06
38.4	ppsA<	ydiA	>aroH			TGCGAGGTGTGTCACA	1.78636e+06
38.5017	ydiA>		>aroH			AGTGATGCGCATCACG	1.78641e+06
38.7512	rplT-pheMST-infA<	rpmI	<infC			TGTGCTTAAAACCACC	1.79796e+06
38.9867	ydjM>		>ydjN			TAAGAGCCAGCTCACA	1.80888e+06
39.2233	chbBCARFG<		<osmE		chbB	-	-
39.7	ynjH<		>gdhA		gdhA	CTTGCTTACCGTCACA	1.8403e+06
39.9372	ydjF<		<ydjG			ACAGATTTTCATCACA	1.85297e+06
40.1	msrB<		>gapA		gapA	CGTGATGAAAATCACA	1.86058e+06
40.1854	mipA<		>yeaGH			TGTGACCAAACTCAAA	1.86449e+06
40.4613	yeaQ<		<yoaG			CGTGATGCTCGTCACA	1.87737e+06
40.5423	yeaU>		>yeaVW			TTTGAACCGCGTCACT	1.88104e+06
40.6901	fadD-sroD<		<yeaY		fadD	-	-
40.7285	yeaZY<	yoaA	>yoaB			CGTCATTACTCTCAAA	1.88953e+06
40.9	yoaE<		>manXYZ		manX	ACGGATCTTCATCACA	1.89992e+06
41.0776	yobF-cspC<		<yebO			TGTGATATTGCACGCA	1.90589e+06
41.8185	yebA<	znuA	>znuCB			AGTGACGAAGATCACC	1.94021e+06
42.5985	flhDC<		<insB		flhD	CGTGATGCAGATCACA	1.97649e+06
42.6853	otsBA<		<araH			GGCGACCCCCGTCACA	1.98049e+06
42.7755	araFGH<		>ftnB		araF	TGAGAGCCATCTCGCA	1.98462e+06
42.8082	isrB(azuC)<		>yecR		isrB	TGTGATACAAATCACA	1.98604e+06
						TATGACAACCATCACA	1.98607e+06
43.6124	dsrA<		>yedP			TGTGACGCACGTCACC	2.02342e+06
43.784	yedJ<	yedR	>rseX			TGTGATAAAAGTCACA	2.03149e+06
43.8042	rseX>		>hchA			CGTCATATACGACACC	2.03243e+06
44.2262	yeeJ>	shiA	>amn			GATGATGGGCATCGCG	2.05198e+06
44.4916	cobUST<		<insH			CGTGAATAACATCGCC	2.06439e+06
44.6749	flu>		>yeeRSTUVW			CATGATATTCATCACG	2.07279e+06
44.8171	sbmC<		<dacD		sbmC	-	-
44.8449	dacD<		>sbcB			TGAGAGGGTAGTCACA	2.08066e+06
45.3422	wbbJK<	wbbI	<rfc			AGAGAGTAAAATCGCA	2.10353e+06
45.5561	galF<	wcaM	<wcaL			TATGCATAACATCACC	2.11358e+06
46.0349	wza-wzb-wzc-wcaAB<		>yegH			TATGACAAATGTCACA	2.13589e+06
46.1535	udk-dcd<	yegE	<alkA			TGAGCAAACAATCACA	2.1413e+06
46.6648	yegQ>		>cyaR		cyaR	-	-
46.8328	gatYZABC<		<fbaB		gatY	GTCGATCGCCGTCACA	2.17033e+06
46.9	fbaB<		>yegT			CGAGATAACGATCACA	2.1753e+06
47.5238	yehL>	yehM	>yehPQ			TACGTTCCAGTTCGCA	2.20486e+06
47.7	yehU<		>mlrA			CGTGAGTACGATCACT	2.21276e+06
48.0329	dusC<		>yohJK			CGTGCTACCGATCACA	2.22859e+06
48.0601	yohK>		>cdd		cdd	TGAGATTCAGATCACA	2.2298e+06
48.1056	yeiS>		>yeiTA		yeiT	TGTGAAAAGATTCACA	2.23195e+06
48.2485	mglBAC<		<galS		mglB	TGTGAAATCACTCACA	2.23863e+06
48.2722	galS<		<yeiB		galS	CGTGAATCGAGTCACA	2.23969e+06
						AGTGAATATGATCACC	2.23977e+06
48.3	cirA<		<lysP		cirA	-	-
48.4294	lysP<	yeiE	>yeiH			ATTGCAGGCAGGCACA	2.2469e+06
48.5774	rihB<	yeiL	<psuT			CGTGATAAAGATCACC	2.25384e+06
48.6554	pscK<		<fruA			TGTGCATCCCGTCACA	2.25748e+06
						TGTGAGCCTGCTCAAA	2.25754e+06
48.8	fruB<		>setB			TGTGCAGCACATCAAA	2.26168e+06
48.8795	lpxT>		>spr			TGTGCGTTAGTCCACA	2.26788e+06
49.0649	yejG<		<bcr			TGTGCAATAGATCACC	2.27645e+06
						TGCGATCTAACTCAAC	2.27659e+06
49.6105	yojO>		>eco			CGGGCTTTTGCTCACA	2.3017e+06
50.3	gyrA<		>ubiG		gyrA,ubiG	-	-
50.4915	ypaB<		>nrdAB		nrdA	-	-
50.6623	glpTQ<		>glpABC		glpT,glpA	TGTGCGGCAATTCACA	2.35051e+06
50.871	yfaXWVU<		<yfaY			TGTGAAGCGCATCAAA	2.3603e+06
51.8	nuoABCFGHIJKLMN<		<lrhA			TGTGATCTACTTCAGG	2.40484e+06
52.3003	argT-hisJQMP<	ubiX	<purF			TTCGATATCTGTGACA	2.42656e+06
52.9966	fadI<	yfcZ	>fadL		fadL	AGTGACCGAAATCACA	2.45907e+06
53.358	dsdC<		>dsdXA		dsdX	AGTGAACCATATCTCA	2.47573e+06
53.4	dsdX>		>dsdA		dsdA	-	-
54.018	fryBC-ypdFE-fryA<		<glk			GTCGACCTGCGTCACA	2.50639e+06
54.1	glk<		>yfeO			ATCGATCTGGGTCACA	2.50755e+06
54.1209	mntH<		>nupC		nupC	TGTGTGTCAGATCTCG	2.51099e+06
54.3867	xapAB<	yfeN	<yfeR			CGCGTGAATTTCCACG	2.52353e+06
54.6	cysK>		>ptsHI-crr		ptsH	TTTGAAGCAGGCCACA	2.53146e+06
54.8	murR<		>murQP-yfeW		murQ	-	-
55.2049	yffP>		>yffQR			TGTGATGCAGATCGCT	2.56145e+06
55.2295	yffR>		>yffS			TGTGATCTGCGTCAAT	2.56246e+06
55.4751	eutSPQTDM<		<maeB			GGTGAGGTAGATCACT	2.57392e+06
55.5351	maeB<		>talA-tktB			AGTGCGTTAATTCACA	2.57665e+06
56.0181	bcp>		>hyfABCDEFGHIJR-focB		hyfA	TGTGATCTTGATCACG	2.59903e+06
56.4292	hda<	uraA	<upp			ATTGATCAGGGACTGA	2.61834e+06
56.4597	upp-uraA<	upp	>purM			TTTGCGGCAATGCACA	2.61937e+06
56.7317	guaBA<		>xseA		guaB,xseA	TGTGAGCGAGATCAAA	2.63225e+06
56.8475	yfgM<	hisS	<ispG			TGTGCCGTTAGCCACT	2.63742e+06
57.4045	yfhR>		>csiE		csiE	-	-
57.844	glyA<		>hmp			ATTGATGTATCTCAAA	2.68382e+06
58.5081	yfiD<		>ung		yfiD	-	-
58.7182	rrfG<		<rrlG			GGTGTTCGGGTTGTCA	2.72451e+06
59	bamD>		>raiA		raiA	CTTGAGGAATATCTCA	2.73502e+06
59.2501	grpE<		>nadK		grpE	-	-
59.6816	ypjK>	yfjS	>yfjT			TGTGATGAAAATCTCA	2.73511e+06
60.0636	ileY<		>csiD-lghO-gabDTP		csiD	TTTGATATTGTCGGCA	2.76902e+06
60.5726	mprA>	emrA	>emrB			GTTGCTTTTGATCACA	2.78688e+06
60.8549	mltB<		>srlAEBD-gutM-srlR-gutQ		srlA	-	-
61.2	ascG		>ascFB		ascF	TGTGCCCATATCCAGA	2.81033e+06
61.5934	mutS>		>pphB			GGTGACCGGTTTCACA	2.83738e+06
61.6287	ygbI<		>ygbJK			CTTGACGTCCTGCGCC	2.85797e+06
61.7734	rpoS<		<nlpD		rpoS	-	-
62.4693	ygcW<		>yqcE-ygcE			TGTGATCGTAATCACA	2.89843e+06
						TGTGAGAGTAATCACG	2.89848e+06
62.7708	relA-chpRA-mazG<		<rumA		relA	-	-
63.0014	csrB<	syd	>queF			TGTGATACAACCCACA	2.92308e+06
63.2	fucAO<		>fucPIKUR		fucA,fucP	AGTGATGGTAGTCACA	2.93206e+06
63.3787	gcvA<		>gcvB			TGTGACCCAAGCCGCA	2.94049e+06
63.4815	mltA<		>metZWV			TTTGTTTTTGTTCAAA	2.94532e+06
63.9535	rppH-ptsP<		<ygdT			TGTGACCTGGGTCACG	2.96732e+06
64.2357	araE<		<kduD		araE	ATTGATAGTAACCATT	2.9802e+06
64.3056	kduI<	yqeF	>yqeG			AGTGATTTTTATCACA	2.98369e+06
64.7466	ygeV<		>ygeW			TGTGATCAACCCCACA	3.00413e+06
64.9627	ygfJ>		>ygfK-ssnA			TGTGAGTTCATTCACA	3.01392e+06
						TGTGAGGCGGCTCGAA	3.01395e+06
65.288	ygfTS<		>ygfU			TGCGACTGAGTTCAAA	3.02906e+06
65.719	gcvTHP<		<visC			TGTGATGGGTATCAAA	3.04911e+06
65.7605	visC<	ubiH	<pepP			AGCGATCGTGGTCACG	3.05129e+06
65.8831	serA<	rpiA	>argP		serA	GGTGACATGTGTCACG	3.05663e+06
65.9235	yqfF<	argP	>scpA-argK-scpBC			TGTGATGTGATTCAAG	3.05864e+06
						TGTGACCATAATCGAG	3.05874e+06
66.1238	mscS<		<fbaA			TGTGATCTATTTGGCA	3.06793e+06
66.2	epd-pgk-fbaA<		<tggC		epd	TGTGATGTGAGTCAGA	3.07192e+06
66.3337	cmtBA-yggPFDC<		<tktA			CGTGTTGTAGATCACA	3.07757e+06
66.4818	yqgD<		>metK		metK	-	-
66.5189	metK>		>galP		galP	TGTGATTTGCTTCACA	3.08623e+06
66.7906	ansB<		<yggN		ansB	-	-
66.8918	mltC>		>nupG		nupG	GGCGATGTTTATCAGA	3.10344e+06
66.9	speC<		>yqgA		speC	-	-
66.9259	nupG>	speC	>yqgA			GTTGAACCGCCCCACC	3.10517e+06
67.0728	yghG<	pppA	<yghJ			GGTGATCGAGGTCGAT	3.11194e+06
67.3799	glcDEFGBA<		>glcC		glcC	-	-
68.2383	ygiS<	ygiT	<mqsR			TGTGAGCCAAATCACT	3.16582e+06
68.7193	insD>	yqiH	>yqiI			TGTGATGCAAGTCACT	3.18817e+06
68.7559	glgS<		>yqiJK		glgS	AGTGAGCAAATTCAAA	3.18828e+06
69.3409	aer<		>ygjG		aer	-	-
69.4	ebgR>		>ebgAC		ebgA	-	-
69.6069	ygjK>		>fadH			TGTGATGGGATTCAAA	3.22959e+06
69.8961	uxaCA<		>exuT		uxaC,exuT	ATTGATCTAACTCACG	3.24286e+06
						GGTGAGAGCCATCACA	3.24298e+06
70.181	yhaOM<		<tdcG			TTTGCGGCAGATCACA	3.25625e+06
70.385	tdcABCDEFG<		>tdcR		tdcA	TGTGTTGAGGATCACA	3.26566e+06
70.5474	garPLRK-rnpB<		>garD			TGTGATCAATGTCAAT	3.27319e+06
70.5664	garPLRK-rnpB<	garD	>sohA-yhaV			GCTGCAACTTTTCACA	3.27395e+06
70.6267	agaR<		>kbaZ-agaVWA		kbaZ	TGTGAATCAGATCAGA	3.27683e+06
71.2	deaD<		<nlpI			TTTGAGCCGGTTCACA	3.30597e+06
71.5	metY-pnp<		>argG		metY,argG	AGTGATCCACGCCACA	3.31642e+06
72.1726	elbB-mtgA<		>ryhA			TGTGATGCGTACCATT	3.34854e+06
72.2565	yhcC<		>gltBDF		gltB	-	-
72.6711	nanATEK-yhcH<		<nanR		nanA	-	-
72.784	rplM-rpsI<	yhcM	>yhcB			ATTGTTGAGGTTCACA	3.37673e+06
72.9016	mdh<		>argR		mdh	-	-
72.9263	argR>		>yhcN			TGTGATATGGGTCACG	3.38351e+06
73.0128	aaeXAB<		>aaeR			TGTGATCTAAATCACT	3.38752e+06
73.4541	prmA>		>dusB-fis		dusB	TGTGAGCTTGCTCGCA	3.40802e+06
73.758	rrfD<	rrlD	<alaU			CCGAACTGTCTCACGA	3.42221e+06
73.9916	def>	fmt	>rsmB			CCTGAACCTGCTCTCG	3.43309e+06
75.1	yhfA<		>crp		yhfA,crp	-	-
75.2309	ppiA<		>tsgA		ppiA	CGTGATCAAAATCACC	3.49046e+06
75.3	tsgA>		>nirBDC-cysG		nirB	-	-
75.3898	yhfL>		>frlABCDR			CATGATGAATATAACA	3.49785e+06
75.9	hofMNOP<		>mrcA		hofM	-	-
76.1	yhgE<		>pck			TGCGATTCCACTCACA	3.53061e+06
						CGTGATTCCTGTCACG	3.53071e+06
76.2	ompR-envZ<		>greB		ompR	-	-
76.3555	bioH<		>gntX-nfuA		gntX	-	-
76.392	nfuA>		>gntT		gntT	TATGACCAACCTCTCA	3.54436e+06
76.5276	malPQ<		>malT		malT	AGTGGTTGAGATCACA	3.55063e+06
						TTTGCACTGTGTCACA	3.55098e+06
76.728	glpEGR<		>glpD		glpE,glpD	-	-
76.9	glgCAP<		<glgX		glgC	-	-
77.0687	gntKU<		<gntR		gntK	TTTGAAGTAGCTCACA	3.57574e+06
77.3864	ugpBAECQ<		<livF		ugpB	-	-
77.5673	rpoH<		<ftsX		rpoH	TGTGGATAAAATCACG	3.59891e+06
78.8061	hdeD>		>gadE-mdtEF		gadE	-	-
79.0075	gadAX<		<yhjA		gadA	-	-
79.0452	yhjA<		>treF			CGTGATCCACCGCACG	3.66752e+06
79.3518	dctA<		<yhjK		dctA	TGCGAGCCAGCTCAAA	3.6816e+06
79.8792	dppABCDF<		<proK			TGTCGTGTAGGTCGAA	3.7063e+06
79.936	eptB<		<yhjX			ACCGAGATAAATCACA	3.70899e+06
80.2649	ysaB<	wecH	<yiaA			TGTGACGGGGCTAACA	3.72402e+06
80.3701	xylAB<		>xylFGHR		xylA,xylF	-	-
80.5114	bax<		>malS		malS	CGCGAGATCGCTCACC	3.73541e+06
80.6218	yiaJ<		>yiaKLMNO-lyxK-sgbHUE		yiaJ,yiaK	-	-
80.9242	aldB<		<yiaY		aldB	-	-
81.3	yibIH<		>mtlADR		mtlA	TGTGATTCAGATCACA	3.76995e+06
						TGTGATATCAATCACA	3.76999e+06
						TGTGATGAACGTCACG	3.77004e+06
						CATGCTGTAGATCACA	3.77011e+06
						TGTGACACTACTCACA	3.77015e+06
82.7616	nepI<		<yicN			CCTGAAACATGCCACG	3.83978e+06
82.8042	yicO<		>ade			AGTGATAATTATCACA	3.84188e+06
82.8793	uhpT<		<uhpC		uhpT	CGTGATGCATCTCACC	3.84532e+06
83.0074	ivbL-ilvBN<		>tisB		ivbL	CGTGATCAACCCCTCA	3.85111e+06
83.1624	yidKJ<	yidL	<yidP			TCCGCTGGAGATCACA	3.85839e+06
83.7639	mnmE>		>tnaCAB		tnaC	-	-
84.1607	bglGFB<		<phoU		bglG	-	-
84.5052	atpIBEFHAGDC<		<gidB			CGTGCTTCAGATCACA	3.92072e+06
84.7319	kup>		>rbsDACBKR		rbsD	-	-
84.9054	yieP-hsrA<		>rrsC-gltY-rrlC-rrfC			TGTGATTACGGTTGCA	3.93941e+06
85.4294	rhlB<		>trxA		trxA	-	-
85.9763	hemCDXY<		>cyaA		cyaA	-	-
86.5227	ysgA<		>udp		udp	AGTGATGCAAATCACA	4.01432e+06
						CGTGATACTCATCACC	4.01437e+06
87.0378	alaT>	rrlA	>rrfA			GCTGAAGTAGGTCCCA	4.03808e+06
87.244	polA>		>spf		spf	-	-
87.4	glnALG<		>typA		glnA	-	-
87.4021	glnLG<	glnA	>typA		glnL	GGCAAACCCGACCACC	4.05511e+06
87.7577	yihUTS<		>yihVW			GATGCGATCCATCACG	4.0718e+06
88.0228	fdoGHI-fdhE<		>fdhD			TGTGACAAATATCACA	4.08408e+06
88.2743	rhaBAD<		>rhaSR		rhaB,rhaS	TGTGAACATCATCACG	4.09559e+06
88.3399	rhaT<		>sodA		rhaT,sodA	-	-
88.356	sodA>		>kdgT			TTTGAAATTGATCACA	4.0996e+06
88.7179	glpFKX<		>yiiU		glpF	-	-
88.7987	hslU<	hslV	<ftsN			GCTGCACCACGTCACC	4.11997e+06
88.8542	cytR<		<priA		cytR	TTCGATCCGCCTCGCA	4.12262e+06
89.2356	ptsA-fsaB-gldA<		>frwCB			CGTTAGGTAGCTCACA	4.14021e+06
						TGTGAGACGCGTCGCA	4.14036e+06
89.6	oxyS<		>oxyR		oxyR	-	-
89.8628	gltT>	rrlB	>rrfB			GCTGAAGTAGGTCCCA	4.1692e+06
90.4834	yjaG>		>hupA		hupA	-	-
90.5172	zraP<		>zraSR		zraS	-	-
90.7572	gltV>	rrlE	>rrfE			ACCGAACTGTCTCACG	4.21067e+06
90.8	metA>		>aceBAK		aceB	-	-
91.2	lysC<		>pgi			GTTGAGTGTAAACCCT	4.23123e+06
91.3525	psiE-yjbT<		<xylE		psiE	ATAGATCTCCGTCACA	4.23829e+06
91.3958	xylE<		<malG			CGTGACTCAGAGCACG	4.24045e+06
91.5	malEFG<		>malK-lamB-malM		malE,malK	TGTGATCTCTGTTACA	4.24456e+06
91.5812	malM>		>ubiCA			TTTGATAAAAATCACA	4.24922e+06
91.9748	yjbS<		>aphA			TATGCGCAAGATCACA	4.26744e+06
92.1027	yjcB<		>yjcC			TGTGAACTATATCACA	4.2732e+06
92.366	acs-yjcH-actP<		>nrfABCDEFG		acs	-	-
92.921	rpiR-alsBACE<		>rpiB			CGTGCAAAACTTCACA	4.31135e+06
93.2896	yjcZ>		>proP		proP	TGTGAAGTTGATCACA	4.32831e+06
93.5	melR<		>melAB		melR,melA	-	-
93.6896	dcuB-fumB<		<dcuR		dcuB	-	-
93.7274	dcuR<		<dcuS		dcuR	-	-
94.115	aspA-dcuA<		>fxsA		aspA	TGTGAAATAGATCACC	4.3665e+06
						AGTGATCCAGATTACG	4.36655e+06
94.1565	yjeH<		>groSL			CCTGATTCACCTCACA	4.36855e+06
95.1564	yjfO<		>yjfP			TGAGATGTGGGTTACG	4.41489e+06
95.2191	ulaG<		>ulaABCDEF		ulaA	AGTGAAAAGTATCACC	4.41763e+06
95.3312	yjfY<		>rpsF-priB-rpsR-rplI			TTTGAAGTTCATCACA	4.42295e+06
95.428	fklB>		>cycA			CGCGAAACAGCTCACA	4.4277e+06
95.5808	cpdB<		>cysQ		cpdB	AGTGAAGAATGCCACA	4.43466e+06
95.6413	ytfJ<		>ytfK			TTCGATAAATAGCACA	4.43735e+06
95.8659	ppa<		>ytfQRT-yjfF			ATTGCGTTACATCACA	4.4479e+06
96	fbp<		>mpl		mpl	-	-
96.1456	nrdDG<		<treC			TTTGATGTAGCTCAAA	4.46093e+06
96.2365	treBC<	treR	>mgtA		treB	CGTGAGCCAGCTCACC	4.46517e+06
96.8288	idnDOTR<		>idnK		idnD,idnK	TGTGATGAAGATCACG	4.4925e+06
97.0249	insG<		>yjhBC			TACGAAAATGAGCACA	4.50179e+06
97.3	fecABCDE<		<fecR		fecA	-	-
97.5061	yjhIHG<		<sgcR			TGTGTACAAGATCACA	4.52393e+06
97.8071	nanCM<		>fimB		nanC	AGTGATATAGCTTACG	4.53778e+06
98.0558	gntP<		>uxuAB		gntP,uxuA	TGCGATGAATGTCACA	4.5494e+06
98.1	uxuB>		>uxuR		uxuR	-	-
98.9	yjiY<		>tsr			TGTGATTCATATCACA	4.58952e+06
99.3424	prfC>		>osmY		osmY	-	-
99.4755	yjjI<		>deoCABD		deoC	TTCGATACACATCACA	4.61521e+06
						TTTGAACCAGATCGCA	4.61526e+06
99.9011	creB>	creC	>creD			TGCGGTGTCGATCAAC	4.63485e+06
* Genes under green background represent the predicted regulation targets of cAP-CRP. Genes under yellow background represent possible regulation targets of cAMPCRP (assigned with 50% possibility).
** Genes shown under orange background represent those detected by Genomic SELEX-chip in this study or listed in Regulon DB.
